# Supplementary material
Source: Springer Nature journal article supplement (https://www.springermedizin.de/resource/supplementary/12958_2011_951_MOESM4_ESM.pdf/9566638)

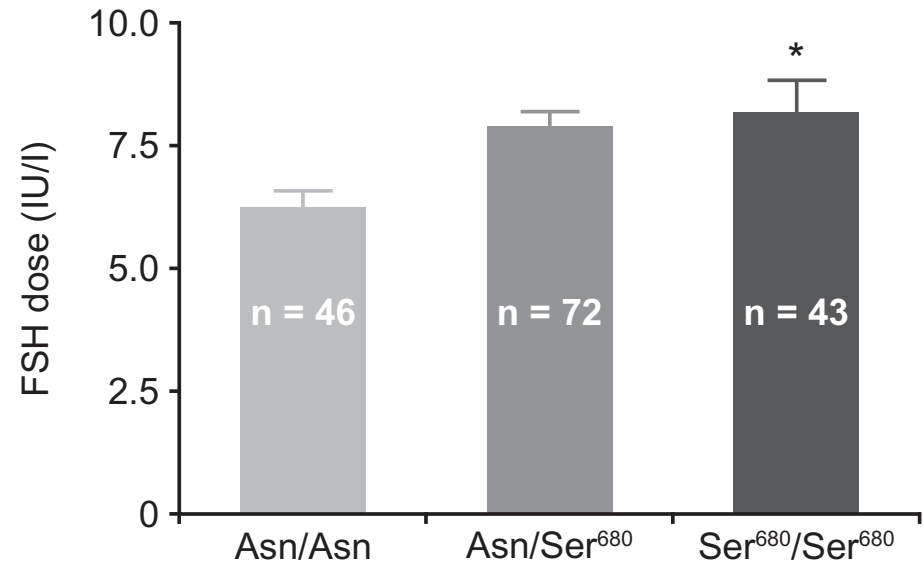

\* $P < 0.05$

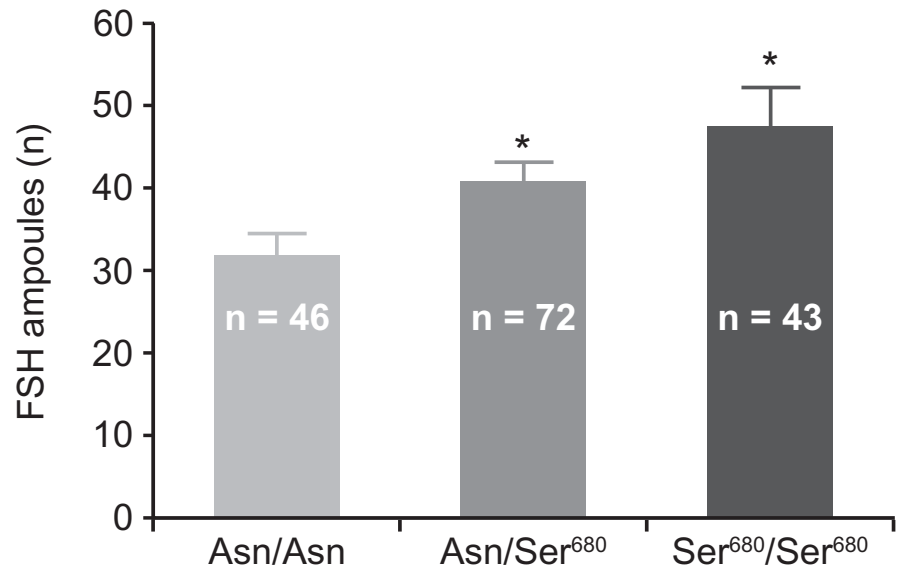

\* $P < 0.05$

Supplement: MOESM4 [file 9566638]
